# Supplementary material for: The causal relationship between anti-diabetic drugs and gastrointestinal disorders: a drug-targeted mendelian randomization study
Source: PubMed Central journal article supplement (PMC11201305; doi:10.1186/s13098-024-01359-z), 2024-06-26

**A**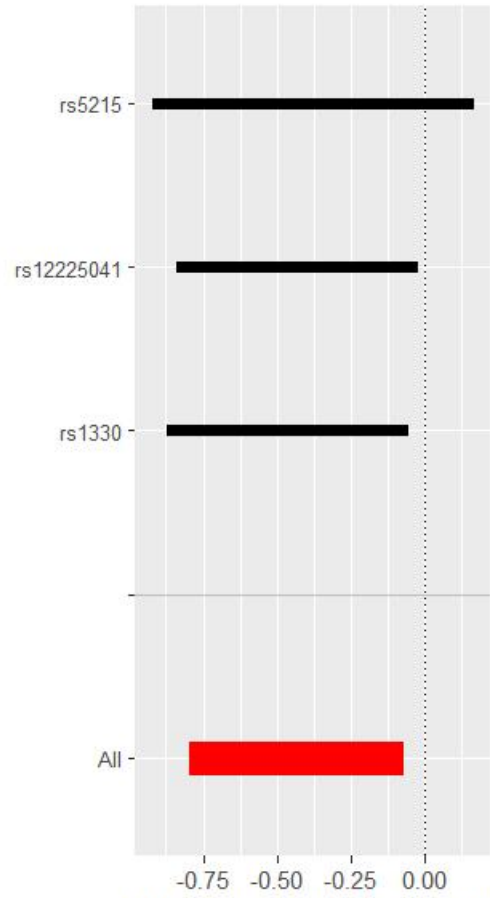

MR leave-one-out sensitivity analysis for  
els || id:ebi-a-GCST90025986' on 'Gastroesophageal reflux

**B**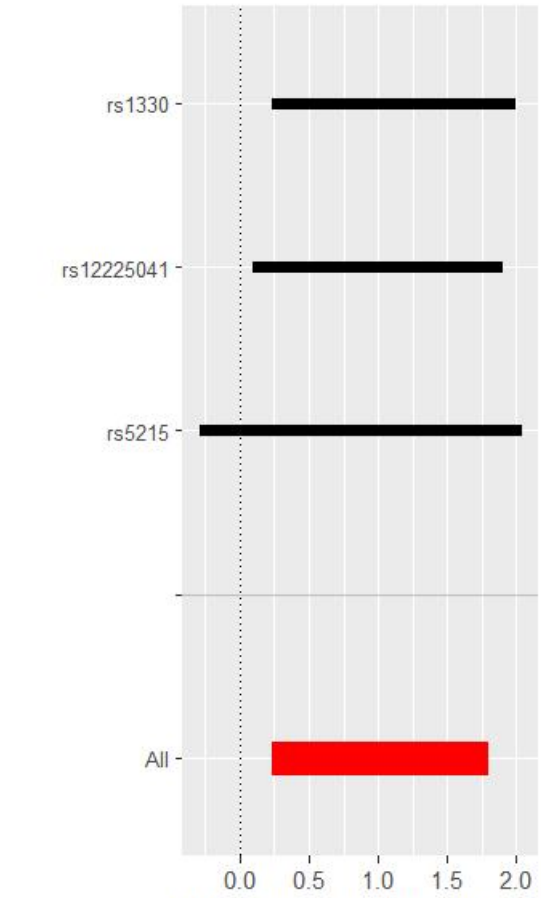

MR leave-one-out sensitivity analysis for  
lucose levels || id:ebi-a-GCST90025986' on 'Gastric ulcer ||

**C**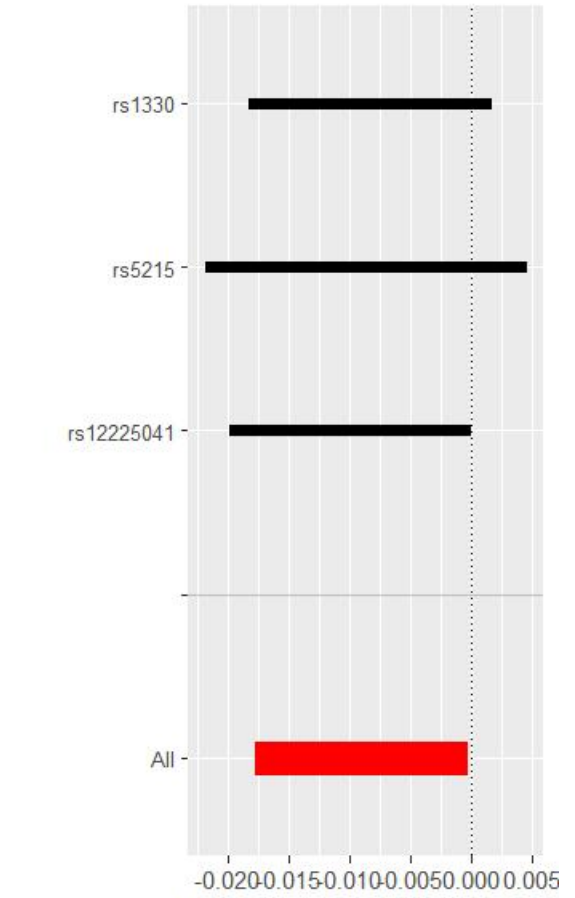

MR leave-one-out sensitivity analysis for  
bi-a-GCST90025986' on 'Diagnoses - main ICD10: K29.5 C

**D**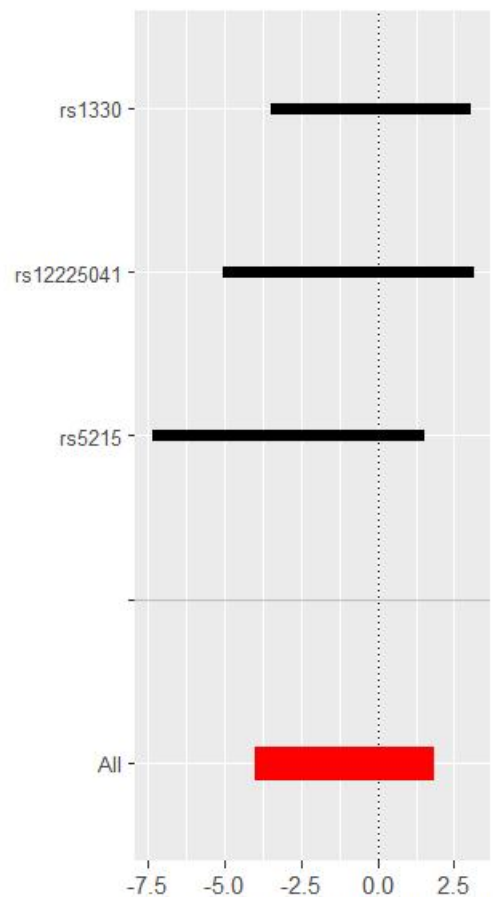

MR leave-one-out sensitivity analysis for glucose levels || id:ebi-a-GCST90025986 on 'Acute gastritis || i

**E**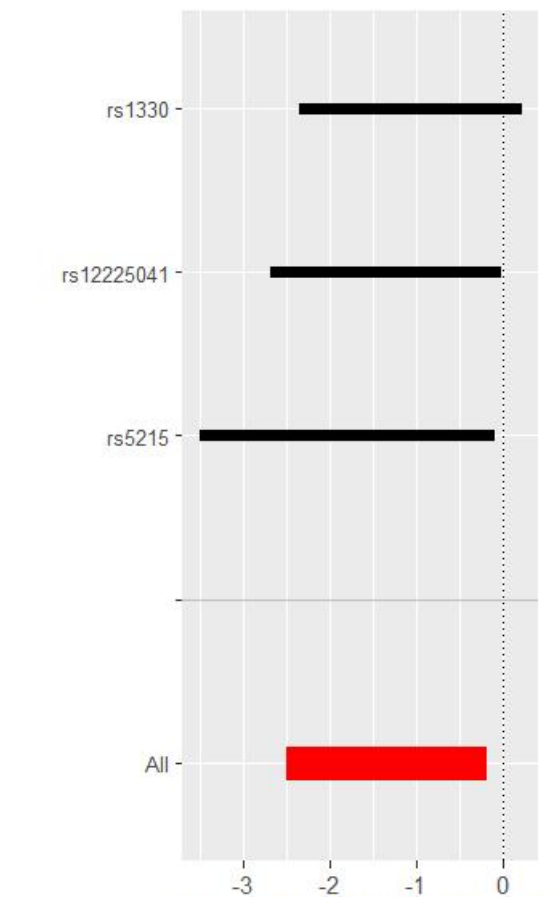

MR leave-one-out sensitivity analysis for glucose levels || id:ebi-a-GCST90025986 on 'Gastric cancer |

**F**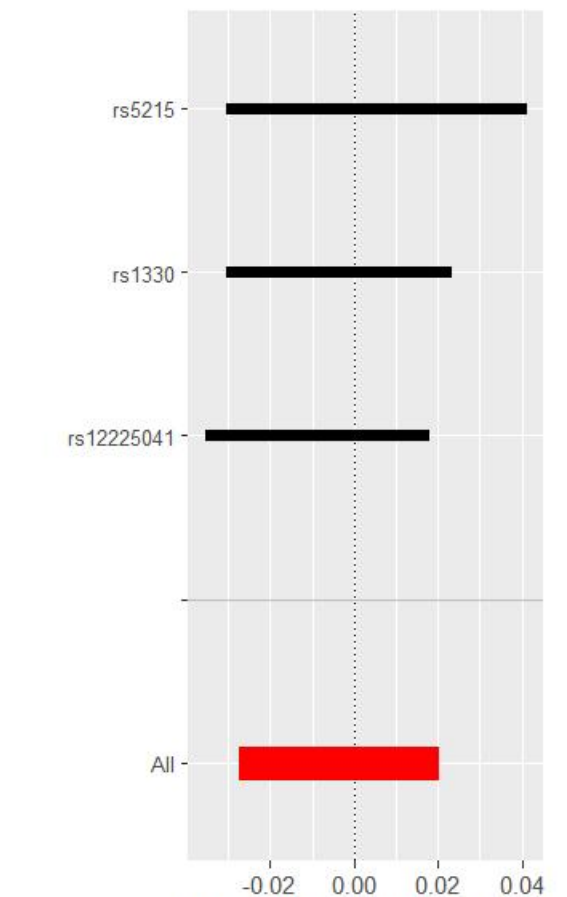

MR leave-one-out sensitivity analysis for i-a-GCST90025986 on 'Non-cancer illness code, self-report

# G

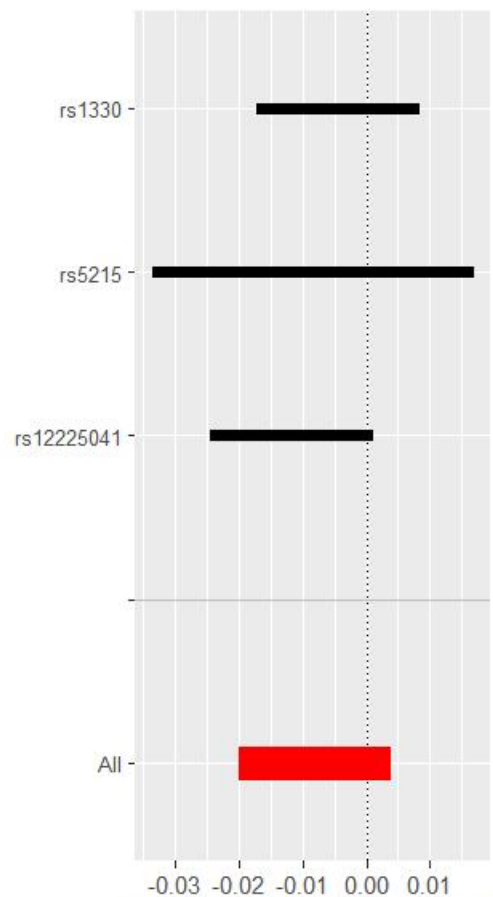

MR leave-one-out sensitivity analysis for d:ebi-a-GCST90025986 on 'Non-cancer illness code, self-re

# H

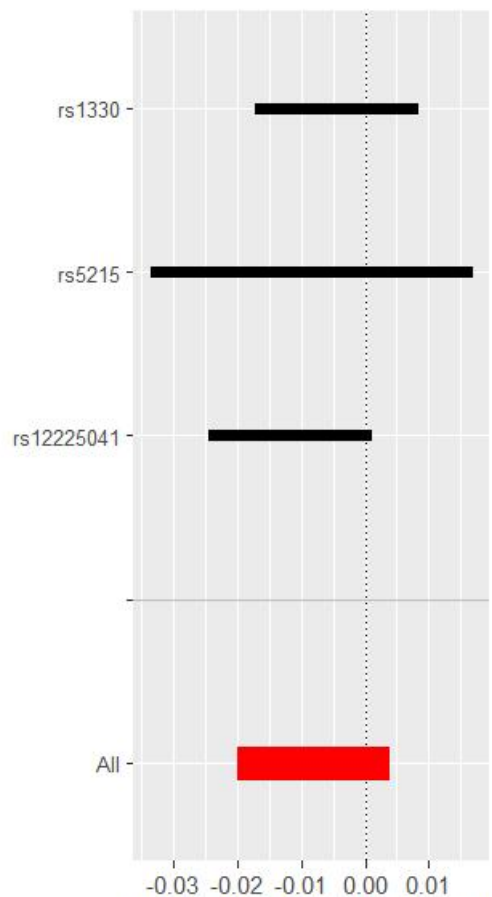

MR leave-one-out sensitivity analysis for d:ebi-a-GCST90025986 on 'Non-cancer illness code, self-re

# I

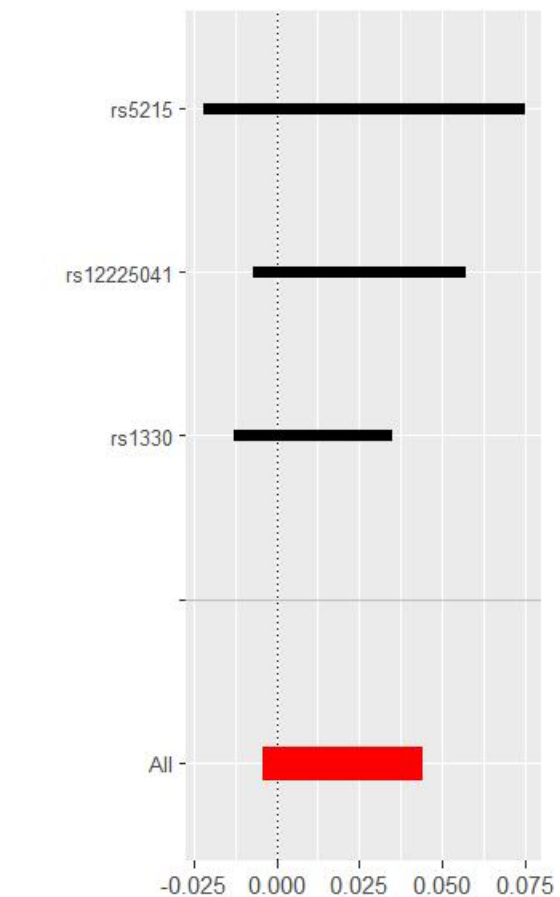

MR leave-one-out sensitivity analysis for d glucose levels || id:ebi-a-GCST90025986 on 'Colorectal c

J

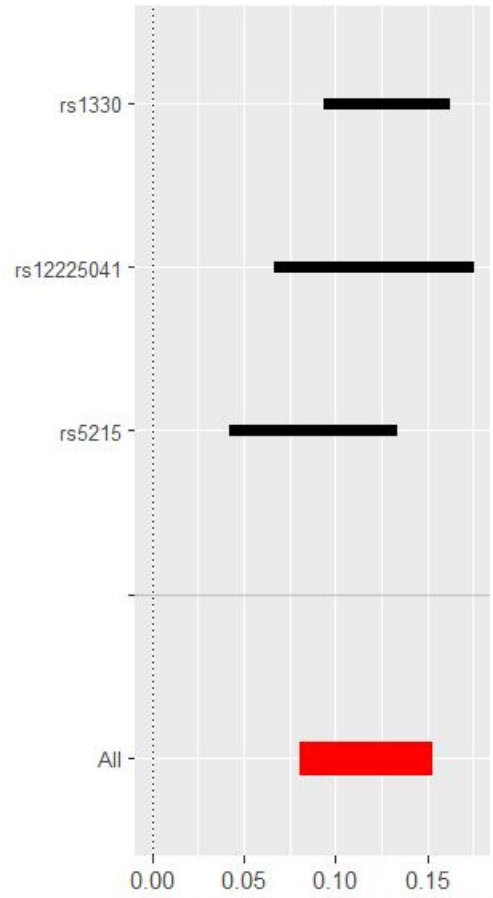

MR leave-one-out sensitivity analysis for || id:ebi-a-GCST90025986 on 'Non-cancer illness code, se

K

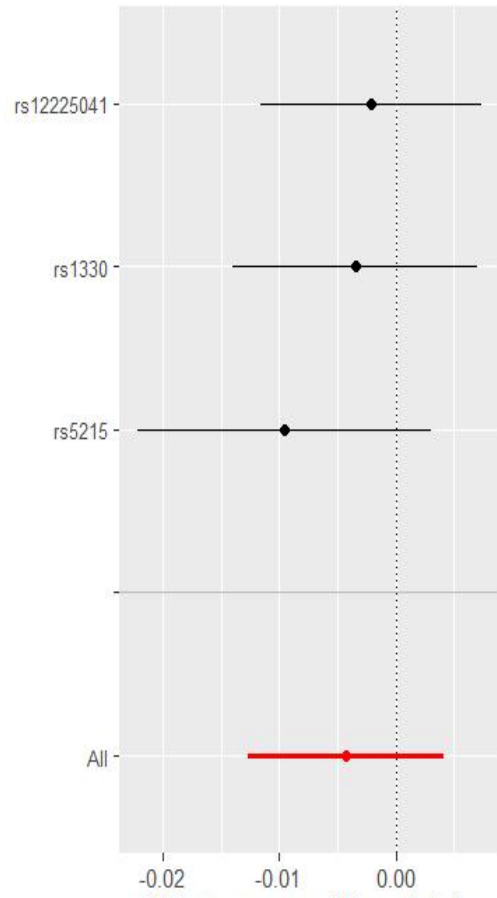

MR leave-one-out sensitivity analysis for s || id:ebi-a-GCST90025986 on 'Non-cancer illness code, self-report

L

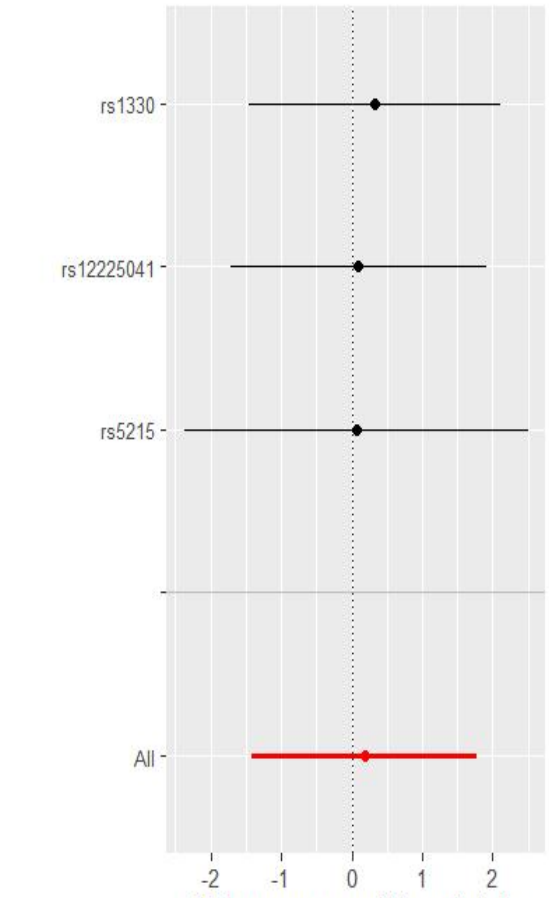

MR leave-one-out sensitivity analysis for ucose levels || id:ebi-a-GCST90025986 on 'Functional dyspepsia || i

# M

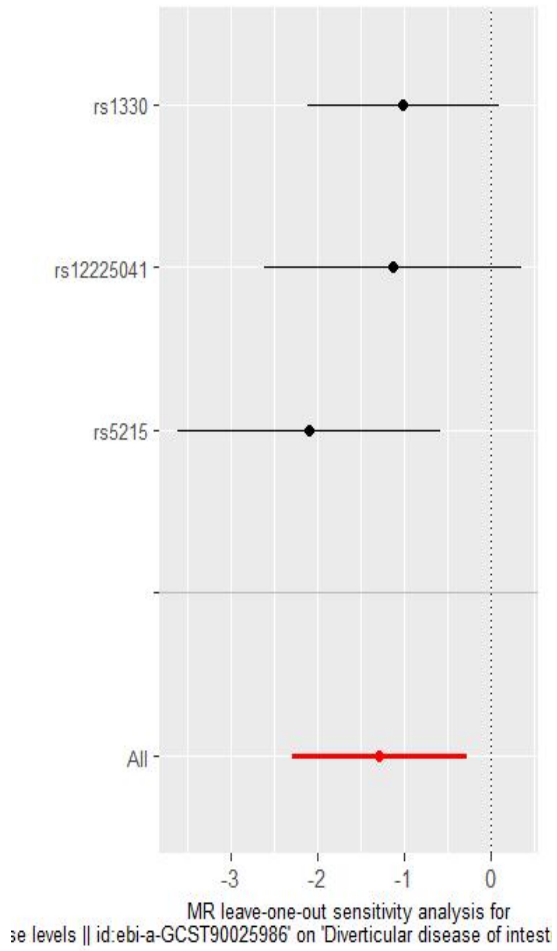

Supplement: 13098_2024_1359_MOESM1_ESM.pdf [file 13098_2024_1359_MOESM1_ESM.pdf]
